# Supplementary material
Source: PubMed Central journal article supplement (PMC7235581)
Supplement: mmc1.pdf [file mmc1.pdf]

**MEDJ, Volume 1**

**Supplemental Information**

**Validation of Predictors of Disease Severity  
and Outcomes in COVID-19 Patients: A Descriptive  
and Retrospective Study**

**Li Tan, Xia Kang, Xinran Ji, Gaoming Li, Qi Wang, Yongsheng Li, Qiongshu Wang, and Hongming Miao**

### Supplemental Figures

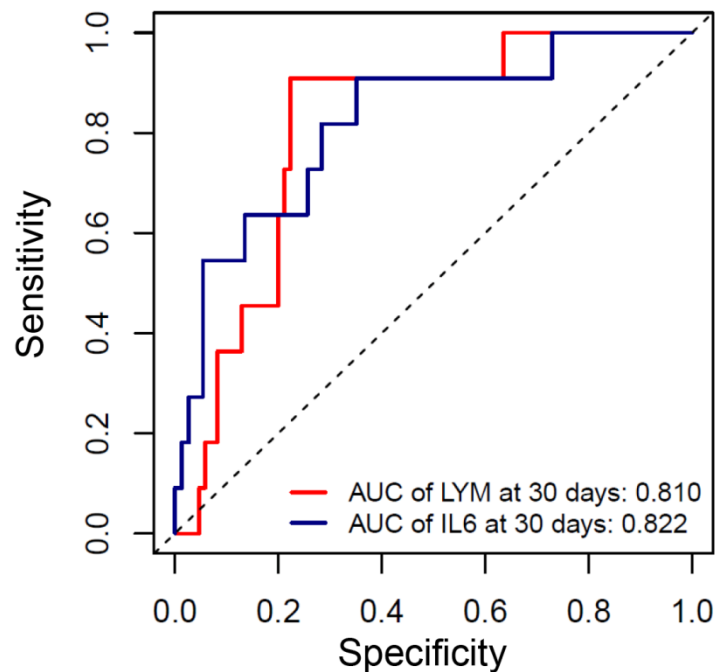

|             |                                        |
|-------------|----------------------------------------|
| <b>LYM%</b> | HR: 0.89, 95% CI: 0.83-0.95, P < 0.001 |
| <b>IL-6</b> | HR: 1.02, 95% CI: 1.01-1.02, P < 0.001 |

**Fig. S1** Validation of LYM% and IL-6 as predictors of prognosis in COVID-19 patients. **Related to Fig. 1**

Information of LYM% and IL-6 levels in survivors (n=117) or non-survivors (n=15) with COVID-19 were collected. The Cox proportional hazard ratio regression model was performed. The AUC values and other statistic parameters were displayed as indicated.

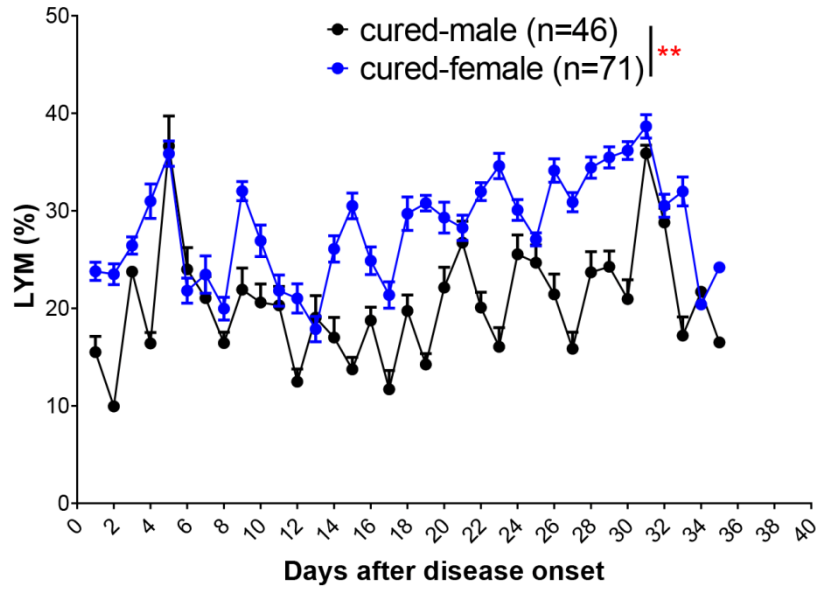

**Fig. S2** The female had higher levels of LYM% than the male patients with COVID-19. **Related to Fig. 1**

The discharged patients including male (n=46) and female (n=71) were enrolled. Information on blood LYM% from admission to discharge was collected. Data showed means  $\pm$  s.e.ms. (\*\*P<0.01; a mixed model with repeated measure)

### Supplemental Tables

**Table S1** Gender and age information of survivors or non-survivors with COVID-19. **Related to Fig. 1**

| Items                       | Total<br>(N=132) | Survivor<br>(n=117) | Non-survivor<br>(n=15) | P<br>values |
|-----------------------------|------------------|---------------------|------------------------|-------------|
| <b>Age(mean±std), years</b> |                  |                     |                        |             |
| Female                      | 51±15            | 52±14               | 45±26                  | 0.879       |
| Male                        | 60±18            | 54±15               | 79±16                  | <0.001      |
| <b>Age group, year</b>      |                  |                     |                        |             |
| ~30                         | 8(6%)            | 8(7%)               | 0(0)                   | <0.001      |
| 30~60                       | 75(57%)          | 73(62%)             | 2(13%)                 |             |
| 60~90                       | 45(34%)          | 36(31%)             | 9(60%)                 |             |
| 90~                         | 4(3%)            | 0(0)                | 4(27%)                 |             |
| <b>Number (%)</b>           |                  |                     |                        |             |
| Female                      | 73(55%)          | 71(61%)             | 2(13%)                 | 0.001       |
| Male                        | 59(45%)          | 46(39%)             | 13(87%)                |             |

**Table S2** Comorbidities of survivors or non-survivors with COVID-19. **Related to Fig. 1**

| Comorbidity                   | Total<br>(N=132) | Survivor<br>(n=117) | Non-survivor<br>(n=15) | P<br>values |
|-------------------------------|------------------|---------------------|------------------------|-------------|
| <b>Cardiovascular disease</b> | 44(33%)          | 35(30%)             | 9(60%)                 | 0.020       |
| Stroke                        | 5(4%)            | 3(3%)               | 2(13%)                 | 0.099       |
| Diabetes                      | 16(12%)          | 9(8%)               | 7(47%)                 | <0.001      |
| Fatty liver                   | 7(5%)            | 5(4%)               | 2(13%)                 | 0.181       |
| Liver cirrhosis               | 2(2%)            | 1(1%)               | 1(7%)                  | 0.215       |
| Pulmonary Tuberculosis        | 3(2%)            | 2(2%)               | 1(7%)                  | 0.306       |
| Anemia                        | 4(3%)            | 4(3%)               | 0(0)                   | 1.000       |
| Hyperlipemia                  | 9(7%)            | 8(7%)               | 1(7%)                  | 1.000       |

**Table S3** Complications of survivors or non-survivors with COVID-19. **Related to Fig. 1**

| Complications                              | Total (N=132) | Survivor (n=117) | Non-survivor (n=15) | P values |
|--------------------------------------------|---------------|------------------|---------------------|----------|
| <b>Acute respiratory distress syndrome</b> | 11(8%)        | 2(2%)            | 9(60%)              | <0.001   |
| <b>Myocarditis</b>                         | 2(2%)         | 1(1%)            | 1(7%)               | 0.215    |
| <b>Septic shock</b>                        | 3(2%)         | 0(0)             | 3(20%)              | 0.001    |
| <b>Hemorrhagic shock</b>                   | 2(2%)         | 0(0)             | 2(13%)              | 0.012    |
| <b>Gastrointestinal bleeding</b>           | 2(2%)         | 0(0)             | 2(13%)              | 0.012    |
| <b>Organ dysfunction</b>                   | 6(5%)         | 0(0)             | 6(40%)              | <0.001   |
| <b>Multiple organ failure</b>              | 25(19%)       | 16(14%)          | 9(60%)              | <0.001   |

**Table S4** Gender and age information of the COVID-19 patients with different disease classification. **Related to Fig. 2~Fig. 7**

| Items                       | Total (N=142) | Critically ill (n=25) | Severe (n=21) | Moderate (n=96) | P values |
|-----------------------------|---------------|-----------------------|---------------|-----------------|----------|
| <b>Age(mean±std), years</b> |               |                       |               |                 |          |
| <b>Female</b>               | 52±15         | 61±8                  | 53±15         | 51±14           | 0.246    |
| <b>Male</b>                 | 61±18         | 76±16                 | 49±15         | 56±16           | <0.001   |
| <b>Age group</b>            |               |                       |               |                 |          |
| ~30                         | 8(6%)         | 0(0)                  | 1(5%)         | 7(7%)           | <0.001   |
| 30~60                       | 79(55%)       | 6(24%)                | 16(76%)       | 57(60%)         |          |
| 60~90                       | 49(35%)       | 13(52%)               | 4(19%)        | 32(33%)         |          |
| 90~                         | 6(4%)         | 6(24%)                | 0(0)          | 0(0)            |          |
| <b>Number (%)</b>           |               |                       |               |                 |          |
| <b>Female</b>               | 77(54%)       | 6(24%)                | 10(48%)       | 61(64%)         | 0.002    |
| <b>Male</b>                 | 65(46%)       | 19(76%)               | 11(52%)       | 35(36%)         |          |
